# Supplementary material for: Predicting Obesity in Adults Using Machine Learning Techniques: An Analysis of Indonesian Basic Health Research 2018
Source: PubMed Central journal article supplement (PMC8255629; doi:10.3389/fnut.2021.669155), 2021-06-21
Supplement: Data_Sheet_1.pdf [file Data_Sheet_1.pdf]

## *Supplementary Material*

### 1 Supplementary Tables

Table S1. Description of obesity dataset from Indonesian RISKESDAS Survey 2018.

| Variables         | Categories     | Composite/Calculation                                                                                                                                                                                |
|-------------------|----------------|------------------------------------------------------------------------------------------------------------------------------------------------------------------------------------------------------|
| <b>Outcome</b>    |                |                                                                                                                                                                                                      |
| 1                 | Obesity Status | 1. Obese<br><br>2. Non-Obese<br><br>Derived from BMI Calculation for Adult ( $\geq 18$ years) according WHO Standard:<br>Weight (kg)/ Height <sup>2</sup> (m)<br>Obese: $\geq 30$ ; Non-Obese $< 30$ |
| <b>Predictors</b> |                |                                                                                                                                                                                                      |
| 2                 | Location       | 1. Urban<br><br>2. Rural<br><br>According to Indonesia Central Bureau of Statistics (BPS) Regulation (Perka BPS No. 37 Tahun 2010)                                                                   |
| 3                 | Sex            | 1. Male<br>2. Female                                                                                                                                                                                 |
| 4                 | Marital Status | 1. Not Married<br>2. Married<br>3. Divorced<br>4. Widowed                                                                                                                                            |
| 5                 | Age group      | 18-20 Years<br>20 - 24 Years<br>25 - 29 Years<br>30 - 34 Years<br>35 - 39 Years<br>40 - 44 Years<br>45 - 49 Years<br>50 - 54 Years<br>55 - 59 Years<br>60 - 64 Years<br>> 64 Years                   |
| 6                 | Education      | Not Schooled<br>Not finished basic school<br>Finished basic school<br>Finished Junior High School                                                                                                    |

|                               |                                                                                                                                          |
|-------------------------------|------------------------------------------------------------------------------------------------------------------------------------------|
|                               | Finished Senior High School<br>Finished Academy/College<br>Finished Higher Education                                                     |
| 7 Occupation                  | Not Working<br>School<br>Government Employee<br>Private Employee<br>Entrepreneur<br>Farmer<br>Fisherman<br>Daily Waged Labours<br>Others |
| 8 Ever Diagnosed Hypertension | Yes<br>No<br>Unknown                                                                                                                     |
| 9 Sugary Foods                | > 1 time per day<br>1 time per day<br>3-6 times per week<br>1 -2 times per week<br>< 3 times per month<br>Never                          |
| 10 Sweet Drinks               | > 1 time per day<br>1 time per day<br>3-6 times per week<br>1 -2 times per week<br>< 3 times per month<br>Never                          |
| 11 Salty Foods                | > 1 time per day<br>1 time per day<br>3-6 times per week<br>1 -2 times per week<br>< 3 times per month<br>Never                          |
| 12 Fatty/Oily Foods           | > 1 time per day<br>1 time per day<br>3-6 times per week<br>1 -2 times per week<br>< 3 times per month<br>Never                          |
| 13 Grilled Foods              | > 1 time per day<br>1 time per day                                                                                                       |

|    |                                  |                                                                                                                 |                                                                                                                                        |
|----|----------------------------------|-----------------------------------------------------------------------------------------------------------------|----------------------------------------------------------------------------------------------------------------------------------------|
|    |                                  | 3-6 times per week<br>1 -2 times per week<br>< 3 times per month<br>Never                                       |                                                                                                                                        |
| 14 | Preserved Foods                  | > 1 time per day<br>1 time per day<br>3-6 times per week<br>1 -2 times per week<br>< 3 times per month<br>Never |                                                                                                                                        |
| 15 | Seasonings Powders               | > 1 time per day<br>1 time per day<br>3-6 times per week<br>1 -2 times per week<br>< 3 times per month<br>Never |                                                                                                                                        |
| 16 | Soft Drinks                      | > 1 time per day<br>1 time per day<br>3-6 times per week<br>1 -2 times per week<br>< 3 times per month<br>Never |                                                                                                                                        |
| 17 | Energy Drinks                    | 1 time per day<br>3-6 times per week<br>1 -2 times per week<br>< 3 times per month<br>Never                     |                                                                                                                                        |
| 18 | Instant Foods                    | 1 time per day<br>3-6 times per week<br>1 -2 times per week<br>< 3 times per month<br>Never                     |                                                                                                                                        |
| 19 | Fruit and Vegetable consumptions | Adequate<br><br>Not Adequate                                                                                    | Using WHO STEPWISE Instrument for Fruit and Vegetable Consumption with Criteria:<br>Adequate: 5 portions of Fruit and Vegetables / day |
| 20 | Physical Activity                | Adequate<br><br>Not Adequate                                                                                    | Using GPAQ Instrument and Standard to measure physical activity adequacy                                                               |
| 21 | Smoking Status                   | Yes<br><br>No                                                                                                   | Considered as smoking if currently or recently quit smoking                                                                            |

|    |                            |     |                                                                                                                                      |
|----|----------------------------|-----|--------------------------------------------------------------------------------------------------------------------------------------|
| 22 | Alcoholic Drinks           | Yes | Using WHO STEPWISE Instrument for Alcohol Consumption<br>Yes: $\geq 5$ Standard volume (male) or $\geq 4$ Standard volume for female |
|    |                            | No  |                                                                                                                                      |
| 23 | Mental/Emotional Disorders | Yes | Using Self Reporting Questionnaire - 20 (SRQ-20) WHO.<br>Score of $\geq 8$ Considered as Having mental/ emotional disorders          |
|    |                            | No  |                                                                                                                                      |

Table S2. Description of obesity status from Indonesian RISKESDAS Survey 2018

| Variables           | Categories                  | Obesity Status |         | Total   |
|---------------------|-----------------------------|----------------|---------|---------|
|                     |                             | Non-obese      | Obese   |         |
| Location (X1)       | Urban                       | 197,456        | 70,457  | 267,913 |
|                     | Rural                       | 286,733        | 64,252  | 350,985 |
| Marital Status (X2) | Not married                 | 75,449         | 9,343   | 84,792  |
|                     | Married                     | 359,116        | 113,153 | 472,269 |
|                     | Divorced                    | 11,400         | 2,933   | 14,333  |
|                     | Widowed                     | 38,224         | 9,280   | 47,504  |
| Age Groups (X3)     | 18 - 24 Years               | 61,926         | 7,606   | 69,532  |
|                     | 25 - 29 Years               | 49,499         | 10,881  | 60,380  |
|                     | 30 - 34 Years               | 53,175         | 15,508  | 68,683  |
|                     | 35 - 39 Years               | 57,094         | 20,444  | 77,538  |
|                     | 40 - 44 Years               | 52,549         | 21,226  | 73,775  |
|                     | 45 - 49 Years               | 50,726         | 19,777  | 70,503  |
|                     | 50 - 54 Years               | 43,613         | 15,005  | 58,618  |
|                     | 55 - 59 Years               | 38,598         | 11,034  | 49,632  |
|                     | 60 - 64 Years               | 28,679         | 6,792   | 35,471  |
| > 64 Years          | 48,330                      | 6,436          | 54,766  |         |
| Education (X4)      | Not/Never Schooled          | 35,258         | 5,603   | 40,861  |
|                     | Not finished basic school   | 69,572         | 15,065  | 84,637  |
|                     | Finished basic school       | 124,463        | 32,928  | 157,391 |
|                     | Finished Junior High School | 80,376         | 24,059  | 104,435 |
|                     | Finished Senior High School | 130,912        | 39,334  | 170,246 |

|                       |                           |                 |        |         |
|-----------------------|---------------------------|-----------------|--------|---------|
|                       | Finished Academy/College  | 14,532          | 5,473  | 20,005  |
|                       | Finished Higher Education | 29,076          | 12,247 | 41,323  |
| Work Types (X5)       | Not Working               | 125,504         | 46,480 | 171,984 |
|                       | School                    | 10,703          | 1,535  | 12,238  |
|                       | Government Employee       | 18,100          | 9,603  | 27,703  |
|                       | Private Employee          | 38,945          | 11,104 | 50,049  |
|                       | Entrepreneur              | 66,585          | 24,426 | 91,011  |
|                       | Farmer                    | 141,901         | 21,108 | 163,009 |
|                       | Fisherman                 | 7,282           | 1,062  | 8,344   |
|                       | Daily Waged Labours       | 43,792          | 8,587  | 52,379  |
|                       | Others                    | 31,377          | 10,804 | 42,181  |
|                       | Sugary Foods (X6)         | >1 time per day | 64,728 | 18,047  |
| 1 time per day        |                           | 97,588          | 28,166 | 125,754 |
| 3-6 times per week    |                           | 109,134         | 29,551 | 138,685 |
| 1 -2 times per week   |                           | 138,537         | 38,636 | 177,173 |
| < 3 times per month   |                           | 49,293          | 13,679 | 62,972  |
| Never                 |                           | 24,909          | 6,630  | 31,539  |
| Sweet Drinks (X7)     | >1 time per day           | 143,500         | 32,596 | 176,096 |
|                       | 1 time per day            | 152,266         | 43,095 | 195,361 |
|                       | 3-6 times per week        | 68,279          | 19,548 | 87,827  |
|                       | 1 -2 times per week       | 72,677          | 22,732 | 95,409  |
|                       | < 3 times per month       | 25,036          | 8,630  | 33,666  |
|                       | Never                     | 22,431          | 8,108  | 30,539  |
| Salty Foods (X8)      | >1 time per day           | 50,731          | 13,929 | 64,660  |
|                       | 1 time per day            | 61,411          | 17,333 | 78,744  |
|                       | 3-6 times per week        | 82,878          | 22,485 | 105,363 |
|                       | 1 -2 times per week       | 134,363         | 36,079 | 170,442 |
|                       | < 3 times per month       | 83,436          | 23,882 | 107,318 |
|                       | Never                     | 71,370          | 21,001 | 92,371  |
| Fatty/Oily Foods (X9) | >1 time per day           | 79,104          | 24,530 | 103,634 |
|                       | 1 time per day            | 86,353          | 26,704 | 113,057 |
|                       | 3-6 times per week        | 104,265         | 29,287 | 133,552 |
|                       | 1 -2 times per week       | 129,898         | 34,805 | 164,703 |
|                       | < 3 times per month       | 58,867          | 13,872 | 72,739  |
|                       | Never                     | 25,702          | 5,511  | 31,213  |
| Grilled Foods (X10)   | >1 time per day           | 10,318          | 2,630  | 12,948  |
|                       | 1 time per day            | 17,294          | 4,895  | 22,189  |
|                       | 3-6 times per week        | 49,777          | 14,190 | 63,967  |
|                       | 1 -2 times per week       | 124,605         | 36,751 | 161,356 |
|                       | < 3 times per month       | 157,720         | 44,531 | 202,251 |

|                                  |                     |         |         |         |
|----------------------------------|---------------------|---------|---------|---------|
|                                  | Never               | 124,475 | 31,712  | 156,187 |
| Preserved Foods (X11)            | >1 time per day     | 4,815   | 1,495   | 6,310   |
|                                  | 1 time per day      | 9,142   | 2,882   | 12,024  |
|                                  | 3-6 times per week  | 24,801  | 7,192   | 31,993  |
|                                  | 1 -2 times per week | 55,947  | 16,671  | 72,618  |
|                                  | < 3 times per month | 113,973 | 31,095  | 145,068 |
|                                  | Never               | 275,511 | 75,374  | 350,885 |
| Seasonings Powders (X12)         | >1 time per day     | 179,277 | 48,080  | 227,357 |
|                                  | 1 time per day      | 176,181 | 50,447  | 226,628 |
|                                  | 3-6 times per week  | 33,493  | 9,105   | 42,598  |
|                                  | 1 -2 times per week | 26,880  | 7,150   | 34,030  |
|                                  | < 3 times per month | 16,460  | 4,427   | 20,887  |
|                                  | Never               | 51,898  | 15,500  | 67,398  |
| Soft / Carbonated Drinks (X13)   | >1 time per day     | 2,975   | 714     | 3,689   |
|                                  | 1 time per day      | 6,288   | 1,569   | 7,857   |
|                                  | 3-6 times per week  | 13,311  | 3,159   | 16,470  |
|                                  | 1 -2 times per week | 35,336  | 8,350   | 43,686  |
|                                  | < 3 times per month | 79,357  | 21,041  | 100,398 |
|                                  | Never               | 346,922 | 99,876  | 446,798 |
| Energy Drinks (X14)              | >1 time per day     | 3,039   | 615     | 3,654   |
|                                  | 1 time per day      | 6,372   | 1,389   | 7,761   |
|                                  | 3-6 times per week  | 10,926  | 1,962   | 12,888  |
|                                  | 1 -2 times per week | 26,092  | 4,953   | 31,045  |
|                                  | < 3 times per month | 48,399  | 10,260  | 58,659  |
|                                  | Never               | 389,361 | 115,530 | 504,891 |
| Instant Foods (X15)              | >1 time per day     | 9,725   | 2,419   | 12,144  |
|                                  | 1 time per day      | 23,167  | 5,776   | 28,943  |
|                                  | 3-6 times per week  | 86,552  | 21,735  | 108,287 |
|                                  | 1 -2 times per week | 172,695 | 47,430  | 220,125 |
|                                  | < 3 times per month | 114,255 | 34,811  | 149,066 |
|                                  | Never               | 77,795  | 22,538  | 100,333 |
| Alcoholic Drinks (X16)           | Yes                 | 26,023  | 4,217   | 30,240  |
|                                  | No                  | 458,166 | 130,492 | 588,658 |
| Mental-Emotional Disorders (X17) | Yes                 | 48,336  | 12,756  | 61,092  |
|                                  | No                  | 435,853 | 121,953 | 557,806 |
| Diagnosed Hypertension (X18)     | Yes                 | 35,895  | 19,745  | 55,640  |
|                                  | No                  | 240,745 | 74,722  | 315,467 |
|                                  | Unknown             | 207,549 | 40,242  | 247,791 |
| Physical Activity (X19)          | Adequate            | 61,465  | 12,271  | 73,736  |
|                                  | Not Adequate        | 422,724 | 122,438 | 545,162 |
| Smoking (X20)                    | Yes                 | 201,708 | 31,598  | 233,306 |
|                                  | No                  | 282,481 | 103,111 | 385,592 |
|                                  | Adequate            | 21,543  | 7,778   | 29,321  |

|                                         |              |         |         |         |
|-----------------------------------------|--------------|---------|---------|---------|
| Fruit and Vegetables Consumptions (X21) | Not Adequate | 462,646 | 126,931 | 589,577 |
|-----------------------------------------|--------------|---------|---------|---------|

Table S3. Probability of each variable on the label of obesity data class using Naïve Bayes method based on fold 6 out of 10-fold CV

| Variables           | Categories                  | Fold 6 out of 10-fold cross validation Test |       |
|---------------------|-----------------------------|---------------------------------------------|-------|
|                     |                             | Non-obese                                   | Obese |
| Location (X1)       | Urban                       | 0.408                                       | 0.507 |
|                     | Rural                       | 0.592                                       | 0.493 |
| Marital Status (X2) | Not married                 | 0.156                                       | 0.219 |
|                     | Married                     | 0.742                                       | 0.624 |
|                     | Divorced                    | 0.024                                       | 0.056 |
|                     | Widowed                     | 0.079                                       | 0.101 |
| Age Groups (X3)     | 18 - 24 Years               | 0.128                                       | 0.108 |
|                     | 25 - 29 Years               | 0.102                                       | 0.120 |
|                     | 30 - 34 Years               | 0.110                                       | 0.129 |
|                     | 35 - 39 Years               | 0.118                                       | 0.138 |
|                     | 40 - 44 Years               | 0.109                                       | 0.133 |
|                     | 45 - 49 Years               | 0.105                                       | 0.131 |
|                     | 50 - 54 Years               | 0.090                                       | 0.090 |
|                     | 55 - 59 Years               | 0.080                                       | 0.063 |
|                     | 60 - 64 Years               | 0.059                                       | 0.048 |
|                     | > 64 Years                  | 0.100                                       | 0.039 |
| Education (X4)      | Not/Never Schooled          | 0.073                                       | 0.039 |
|                     | Not finished basic school   | 0.144                                       | 0.120 |
|                     | Finished basic school       | 0.257                                       | 0.223 |
|                     | Finished Junior High School | 0.166                                       | 0.176 |
|                     | Finished Senior High School | 0.270                                       | 0.324 |
|                     | Finished Academy/College    | 0.030                                       | 0.037 |
|                     | Finished Higher Education   | 0.060                                       | 0.082 |
| Work Types (X5)     | Not Working                 | 0.259                                       | 0.259 |
|                     | School                      | 0.022                                       | 0.020 |
|                     | Government Employee         | 0.037                                       | 0.064 |
|                     | Private Employee            | 0.080                                       | 0.103 |
|                     | Entrepreneur                | 0.138                                       | 0.187 |
|                     | Farmer                      | 0.293                                       | 0.198 |
|                     | Fisherman                   | 0.015                                       | 0.009 |
|                     | Daily Waged Labours         | 0.091                                       | 0.084 |
|                     | Others                      | 0.065                                       | 0.076 |
| Sugary Foods (X6)   | >1 times per day            | 0.134                                       | 0.169 |

## Supplementary Material

|                                |                     |       |       |
|--------------------------------|---------------------|-------|-------|
|                                | 1 times per day     | 0.201 | 0.204 |
|                                | 3-6 times per week  | 0.225 | 0.215 |
|                                | 1-2 times per week  | 0.286 | 0.252 |
|                                | < 3 times per month | 0.102 | 0.113 |
|                                | Never               | 0.051 | 0.048 |
| Sweet Drinks (X7)              | >1 times per day    | 0.297 | 0.284 |
|                                | 1 times per day     | 0.314 | 0.305 |
|                                | 3-6 times per week  | 0.141 | 0.147 |
|                                | 1-2 times per week  | 0.150 | 0.149 |
|                                | < 3 times per month | 0.052 | 0.065 |
|                                | Never               | 0.046 | 0.050 |
| Salty Foods (X8)               | >1 times per day    | 0.105 | 0.118 |
|                                | 1 times per day     | 0.127 | 0.152 |
|                                | 3-6 times per week  | 0.171 | 0.163 |
|                                | 1-2 times per week  | 0.277 | 0.248 |
|                                | < 3 times per month | 0.172 | 0.171 |
|                                | Never               | 0.147 | 0.147 |
| Fatty/Oily Foods (X9)          | >1 times per day    | 0.163 | 0.190 |
|                                | 1 times per day     | 0.178 | 0.191 |
|                                | 3-6 times per week  | 0.216 | 0.213 |
|                                | 1-2 times per week  | 0.268 | 0.256 |
|                                | < 3 times per month | 0.121 | 0.117 |
|                                | Never               | 0.053 | 0.033 |
| Grilled Foods (X10)            | >1 times per day    | 0.021 | 0.043 |
|                                | 1 times per day     | 0.036 | 0.059 |
|                                | 3-6 times per week  | 0.103 | 0.138 |
|                                | 1-2 times per week  | 0.257 | 0.264 |
|                                | < 3 times per month | 0.326 | 0.304 |
|                                | Never               | 0.257 | 0.191 |
| Preserved Foods (X11)          | >1 times per day    | 0.010 | 0.033 |
|                                | 1 times per day     | 0.019 | 0.034 |
|                                | 3-6 times per week  | 0.051 | 0.076 |
|                                | 1-2 times per week  | 0.116 | 0.153 |
|                                | < 3 times per month | 0.236 | 0.255 |
|                                | Never               | 0.569 | 0.449 |
| Seasonings Powders (X12)       | >1 times per day    | 0.371 | 0.324 |
|                                | 1 times per day     | 0.364 | 0.338 |
|                                | 3-6 times per week  | 0.069 | 0.088 |
|                                | 1-2 times per week  | 0.056 | 0.064 |
|                                | < 3 times per month | 0.034 | 0.056 |
|                                | Never               | 0.107 | 0.129 |
| Soft / Carbonated Drinks (X13) | >1 times per day    | 0.006 | 0.012 |
|                                | 1 times per day     | 0.013 | 0.041 |



|                                         |                     |       |       |
|-----------------------------------------|---------------------|-------|-------|
|                                         | 3-6 times per week  | 0.027 | 0.063 |
|                                         | 1-2 times per week  | 0.073 | 0.138 |
|                                         | < 3 times per month | 0.164 | 0.228 |
|                                         | Never               | 0.716 | 0.518 |
| Energy Drinks (X14)                     | >1 times per day    | 0.006 | 0.015 |
|                                         | 1 times per day     | 0.013 | 0.041 |
|                                         | 3-6 times per week  | 0.022 | 0.054 |
|                                         | 1-2 times per week  | 0.054 | 0.115 |
|                                         | < 3 times per month | 0.100 | 0.181 |
|                                         | Never               | 0.804 | 0.594 |
| Instant Foods (X15)                     | >1 times per day    | 0.020 | 0.028 |
|                                         | 1 times per day     | 0.048 | 0.062 |
|                                         | 3-6 times per week  | 0.179 | 0.206 |
|                                         | 1-2 times per week  | 0.357 | 0.323 |
|                                         | < 3 times per month | 0.236 | 0.244 |
|                                         | Never               | 0.161 | 0.137 |
| Alcoholic Drinks (X16)                  | Yes                 | 0.054 | 0.254 |
|                                         | No                  | 0.946 | 0.746 |
| Stress (X17)                            | Yes                 | 0.100 | 0.268 |
|                                         | No                  | 0.900 | 0.732 |
| Diagnosed Hypertension (X18)            | Yes                 | 0.074 | 0.155 |
|                                         | No                  | 0.497 | 0.468 |
|                                         | Unknown             | 0.429 | 0.377 |
| Physical Activity (X19)                 | Adequate            | 0.127 | 0.250 |
|                                         | Not Adequate        | 0.873 | 0.750 |
| Smoking (X20)                           | Yes                 | 0.417 | 0.434 |
|                                         | No                  | 0.583 | 0.566 |
| Fruit and Vegetables Consumptions (X21) | Adequate            | 0.045 | 0.162 |
|                                         | Not Adequate        | 0.955 | 0.838 |
